# Supplementary material
Source: publisher figshare collection journal article supplement (https://diabetesjournals.figshare.com/ndownloader/files/22544402)
Supplement: Supplementary file 1 [file 22544402]

SUPPLEMENTARY DATA

**Supplementary Figure S1.** *A-C*: Food intake (A), body weight (B) and blood glucose (C) in pregnant mice administrated with DEX in the third trimester of gestation (n = 6 in each group). *D-H*: Calorie intake (D), glucose concentration under the curve of glucose tolerance test (E). *F-H*: Oxygen consumption (F), CO2 production (G) and energy expenditure (H) normalized to total body mass (TBM). *I-N*: O2 consumption (L), CO2 respiration (M) and energy expenditure (N) were regressed to lean body mass (LBM) in offspring fed chow or high fat diet (HFD). Data are mean ± s.e.m. and each dot represents one replicate; Unpaired one-way ANOVA multiple test was used in analyses. For metabolic analyses, total body mass or lean body mass was used as a co-variance and respectively regressed to metabolic data, and these analyses were performed by NIDDK MMPC ANCOVA regression tools.


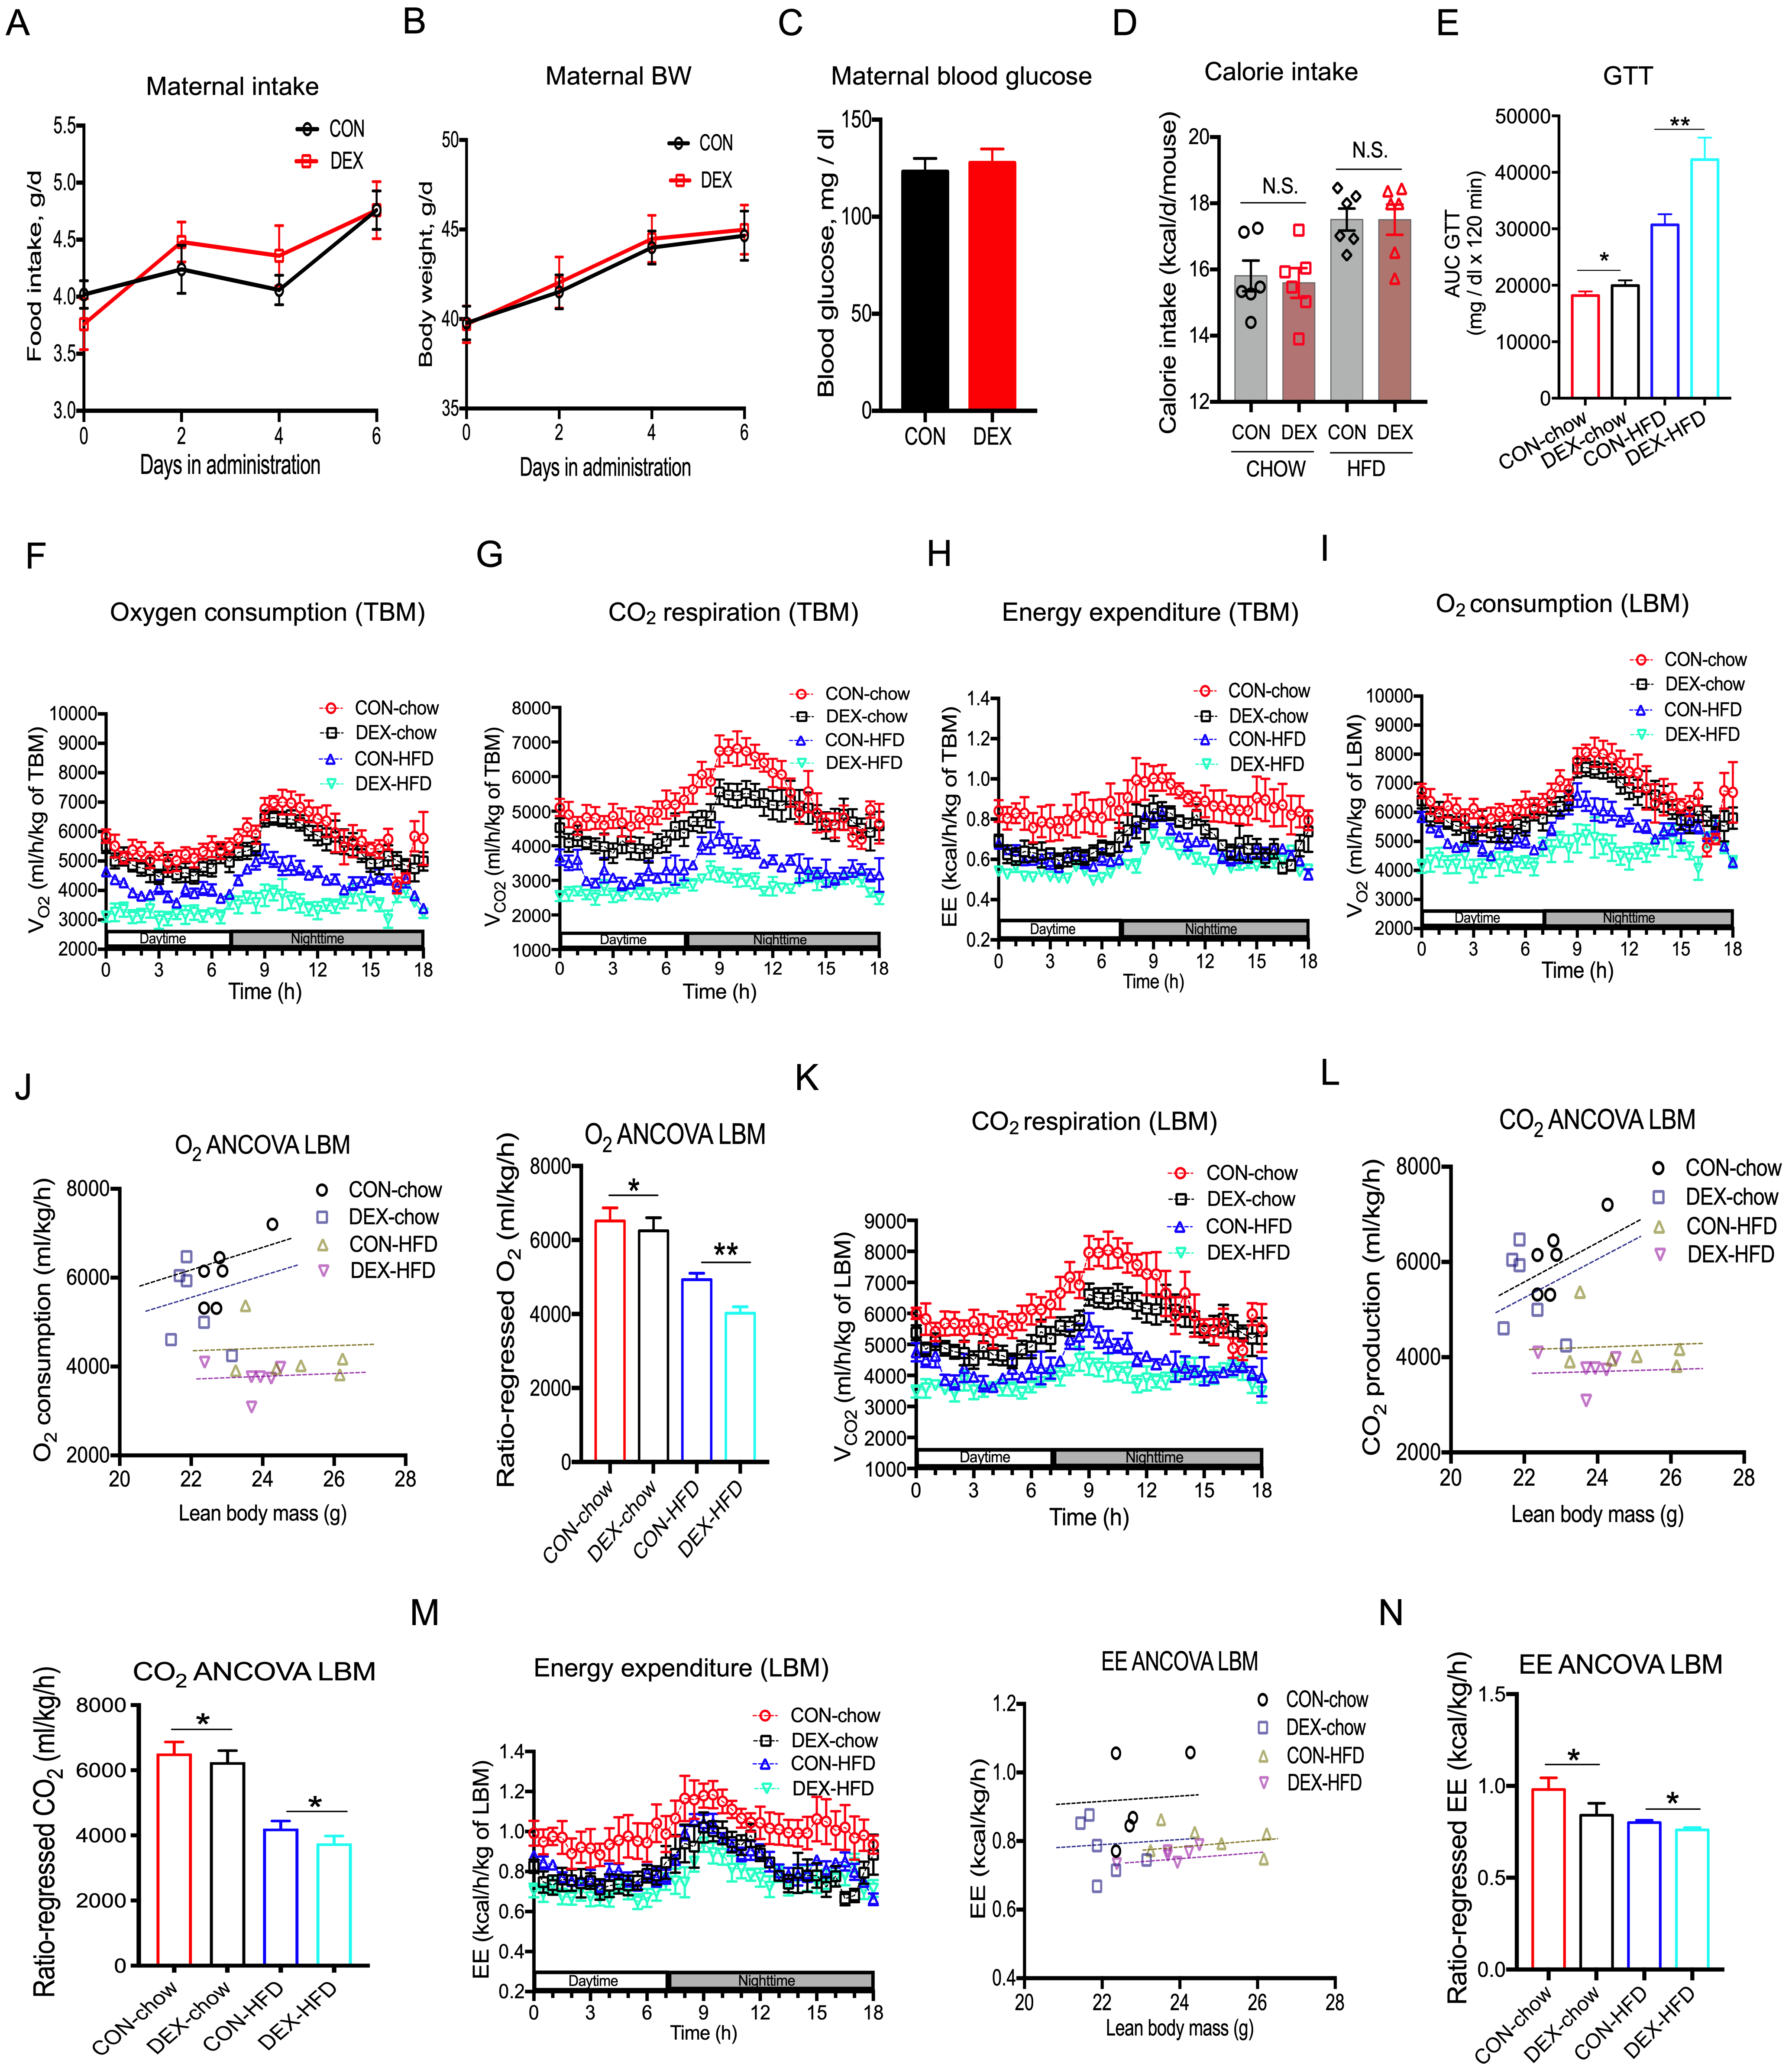


SUPPLEMENTARY DATA

**Supplementary Figure S2.** A: Immunoblotting shows IRS-1 (T612) and Akt (S473) phosphorylation in BAT stimulated by intraperitoneal insulin administration (1 U/kg) after 20 min. β-Tubulin was used as a loading control. B: Dissected total fat mass including white and brown fat. *Q-R*: Gastrocnemius (GAS) and tibialis (TA) muscle mass. Data are mean ± s.e.m. and each dot represents one replicate; Unpaired one-way ANOVA multiple test was used in analyses.


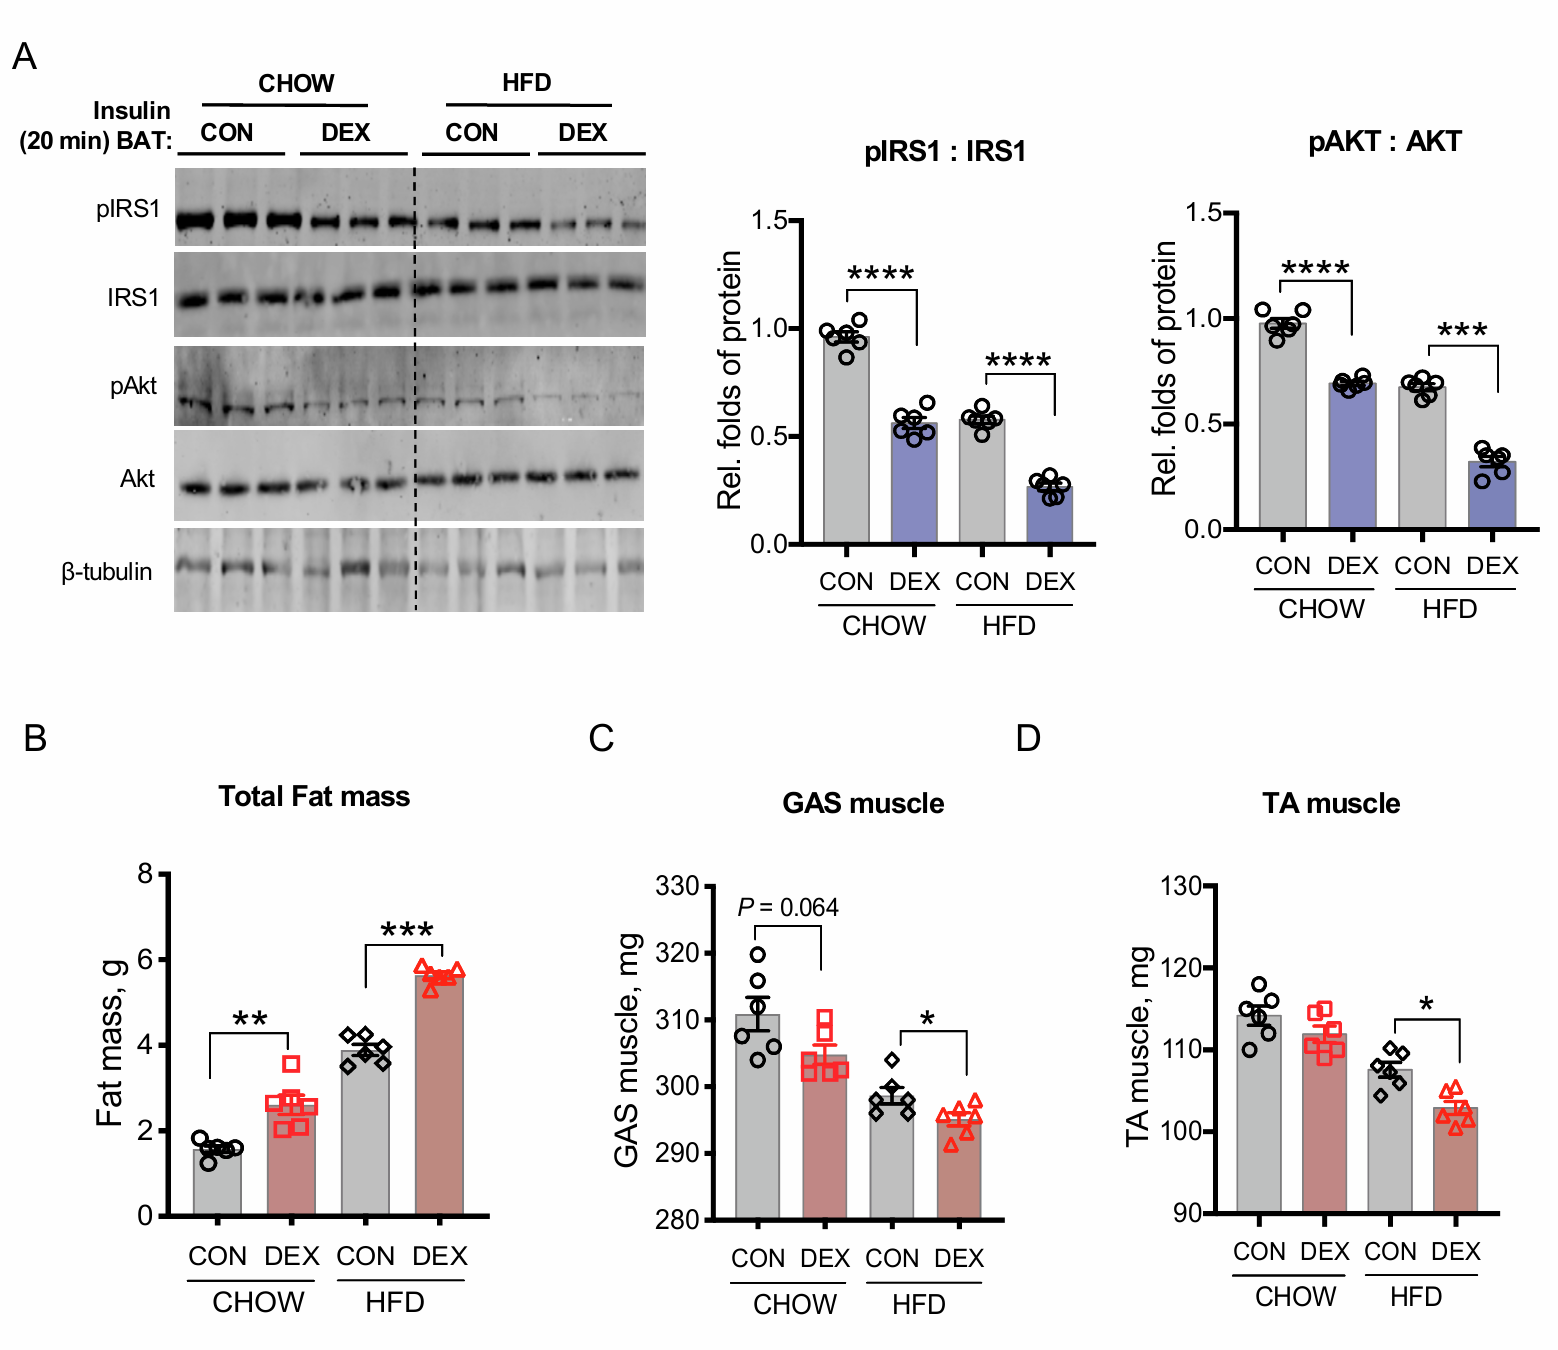


SUPPLEMENTARY DATA

**Supplementary Figure S3.** *A-L***:** DEX and control offspring at 4 months of age were acclimated to 30˚C thermoneutrality for 4 wks. Under thermoneutrality, UCP-1 protein in BAT (A), calorie intake (B) and body mass (C), glucose tolerance test (D), fasting insulin concentration (E) and insulin resistance (HOMR-IR) (F). *G-L*: For metabolic analyses, O2 consumption, CO2 production and energy expenditure under thermoneutrality were regressed to total or lean body mass respectively according to guidelines of NIDDK MIPPC ANCOVA regression tools. Data are mean ± s.e.m. and each dot represents one replicate (one pregnancy); Unpaired one-way ANOVA multiple test was used for *A-F* analyses. Multiple linear regression ANCOVA was used for *G-L* analyses.


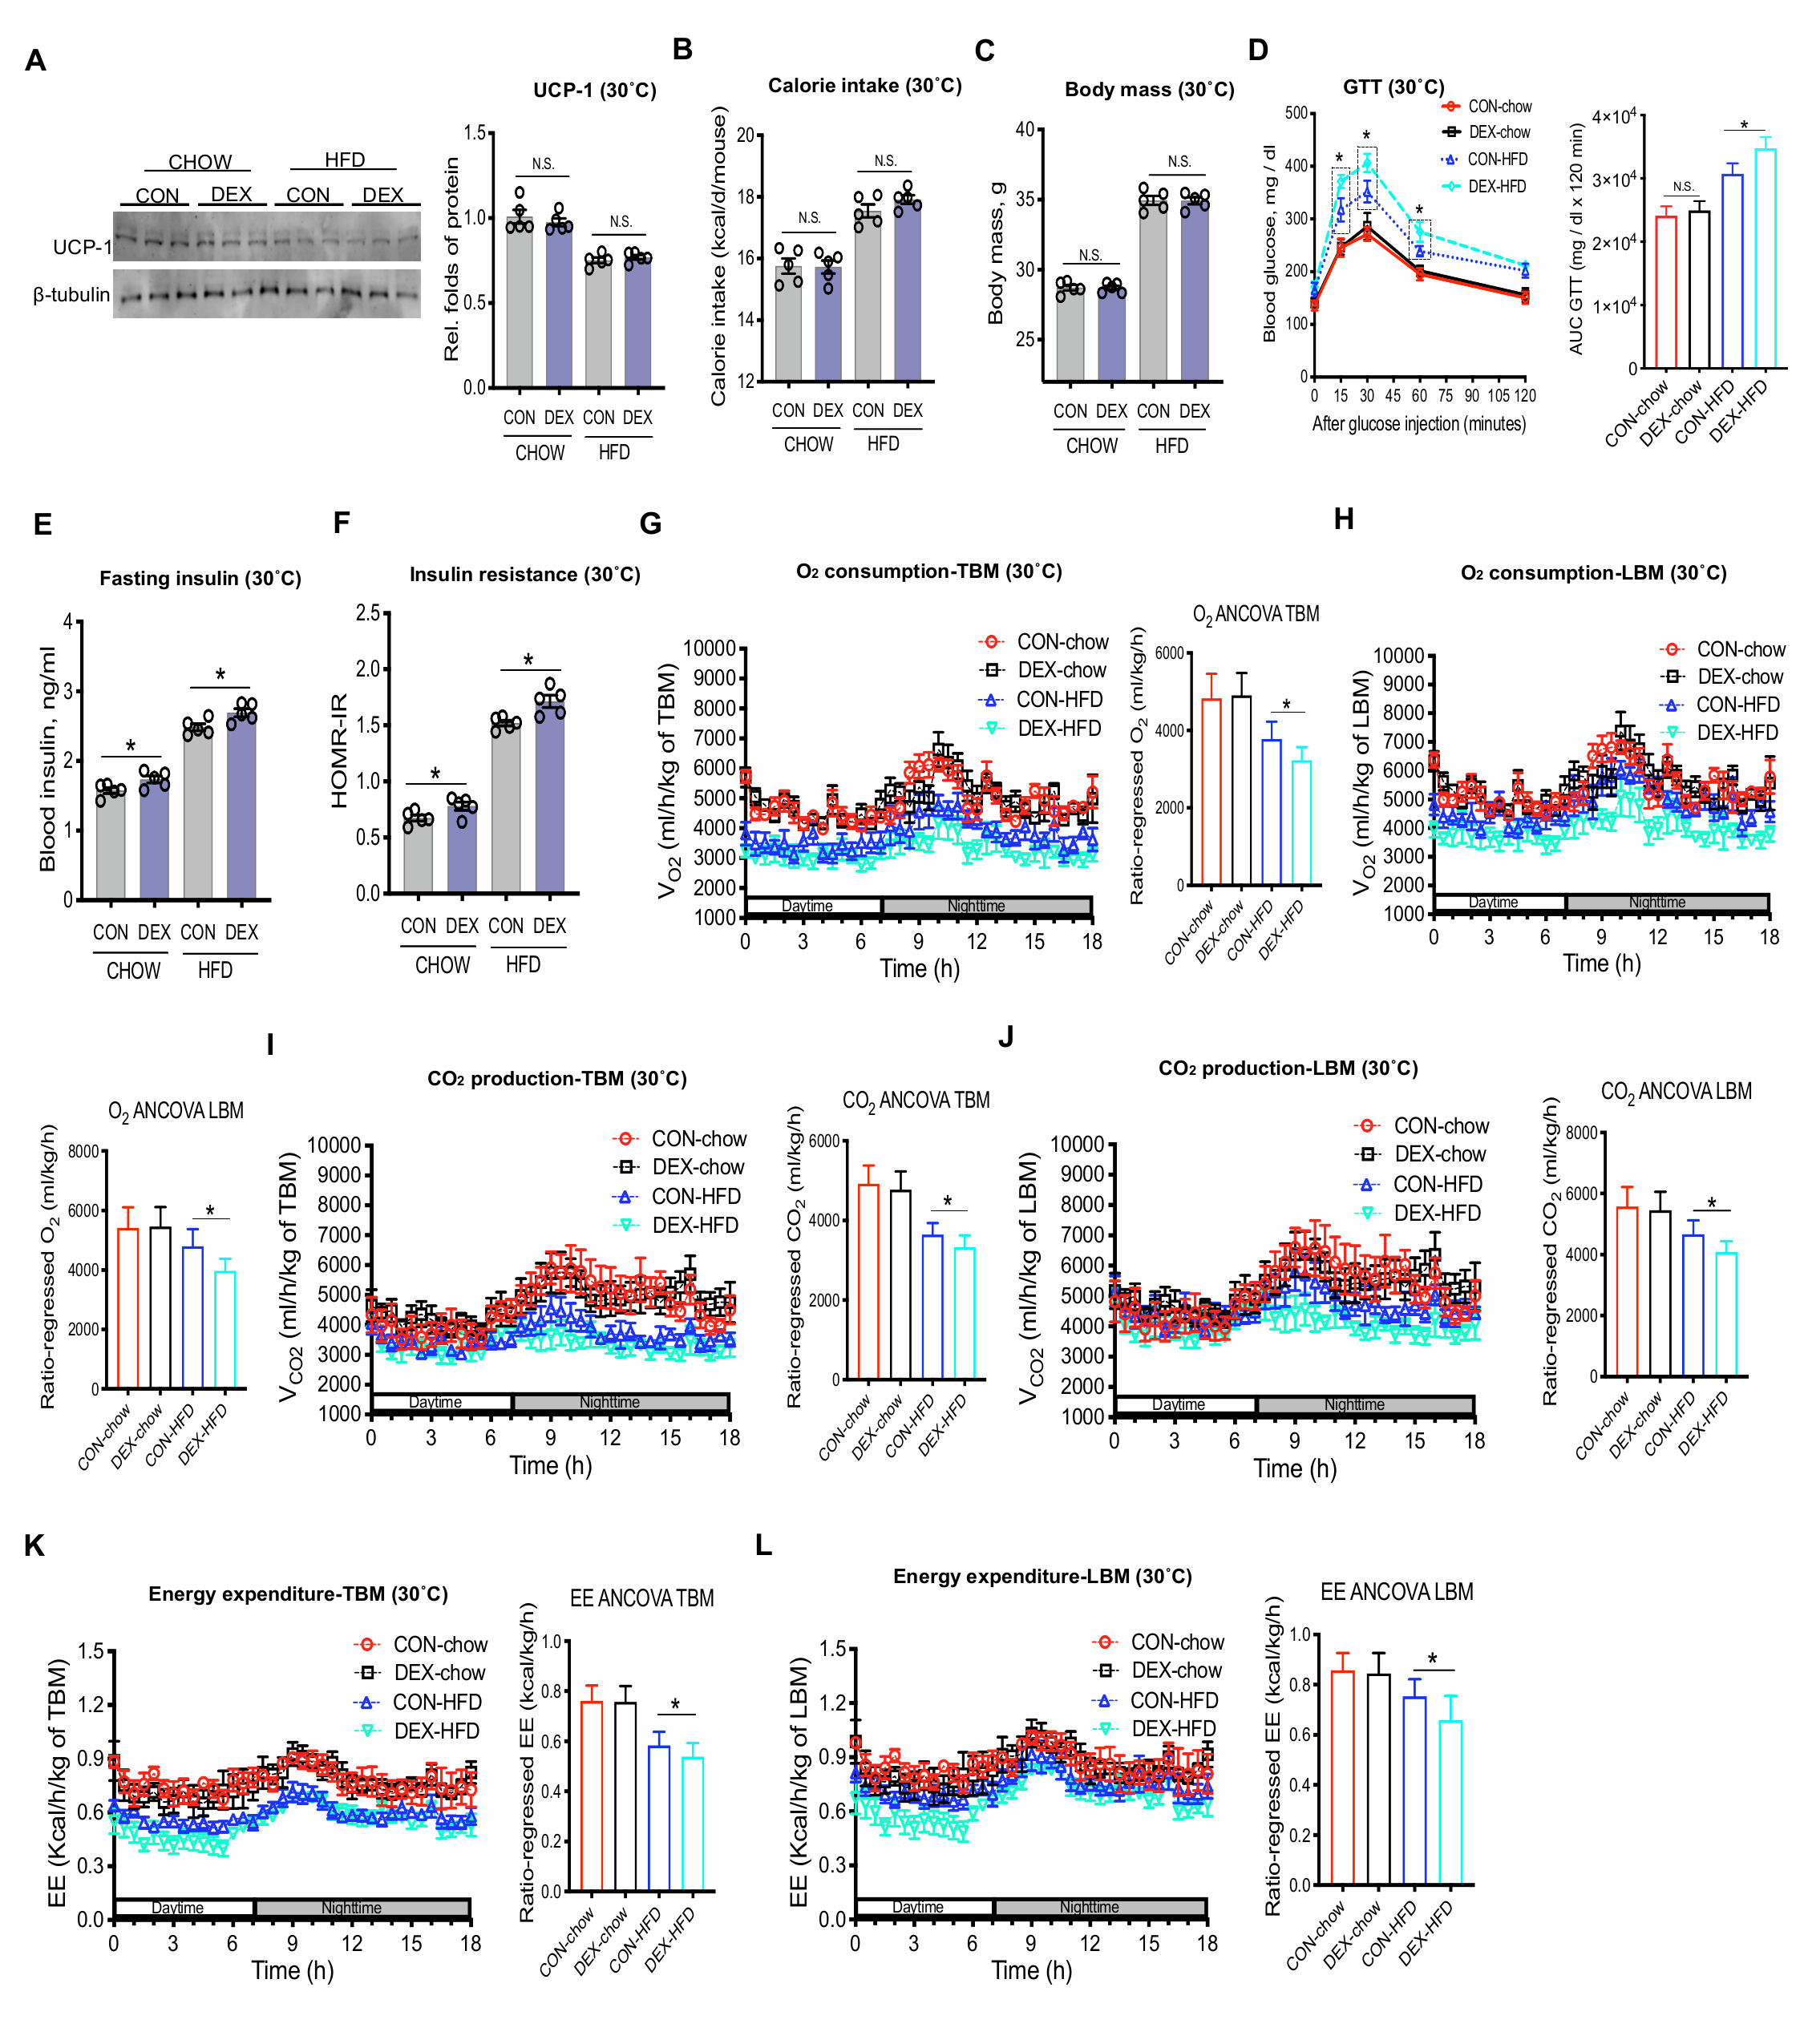


SUPPLEMENTARY DATA

**Supplementary Figure S4.** *A-C*: Quantified protein contents of PRDM16 (A), PGC-1a (B) and UCP-1 (C) in BAT of offspring exposed to 4˚C for 2 days at 4 months of age (n = 5 per group). *D-F*:Quantified protein contents of CYTO-C (A), VDAC (B) and PGC-1a (C) in BAT of offspring at 4 months of age (n = 6 per group). Data are mean ± s.e.m. and each dot represents one replicate; Unpaired one-way ANOVA multiple test was used in analyses.

**
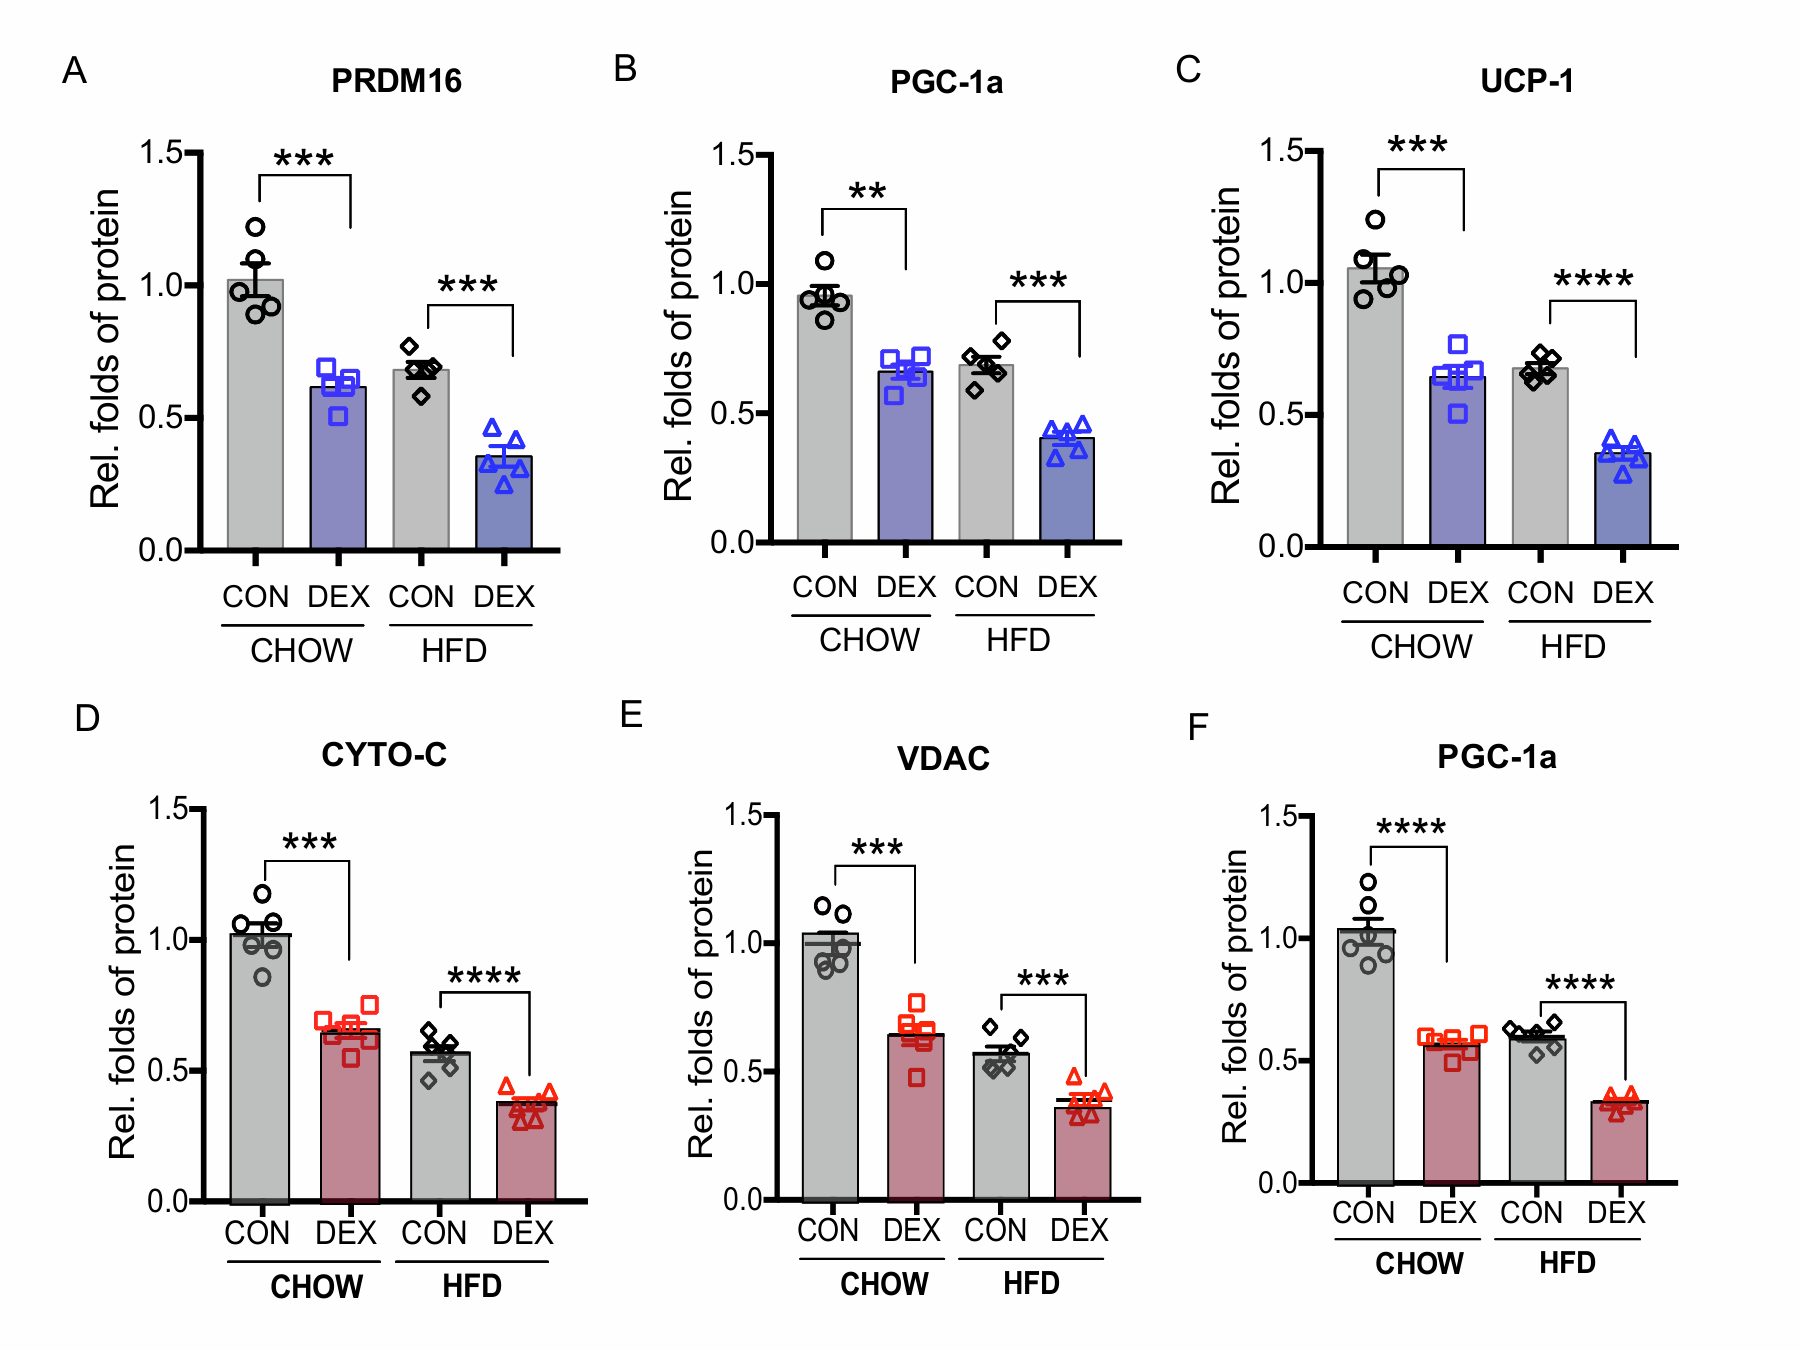
**

SUPPLEMENTARY DATA

**Supplementary Figure S5.** *A*: Diagram shows CpG islands located in the *Ppargc1a* promoter and transcriptional starting site (TSS) shores, including glucocorticoid receptors potential binding region (GRBR, R1), proximal tissue specific-DNA methylation region (T-DMR, R2), and intergenic regulated region rich in CpG sites (IR, R3). Analyses were based on the genome wide epigenetic database in National Center for Biotechnology Information and MethPrimer 2.0. At upstream of 1591 bp locus from transcriptional starting sites (TSS), a conserved potential GC responsive binding motif (GRE) is harbored in the *Ppargc1a* promoter.*B* and *C*: Relative fold changes of 5-methyl cytosine (5mC) quantified by MeDIP-qPCR in the *Ppargc1a* transcriptional regulatory regions R1, R2 and R3 in BAT (panel *B*) and brown progenitors (panel *C*) of offspring at weaning P21. Mock IgG was used as a negative control (n = 6 in each group). *D*: Diagram showed the CpG island region in promoters of *Nrf1*, *Pax3* and *Zfp423*. *E*: Relative fold changes of 5-methyl cytosine (5mC) quantified by MeDIP-qPCR in promoters of *Ppargc1a*-unassociated genes in neonatal BAT and brown progenitors, including *Nrf1*, *Pax3* and *Zfp423*. Mock IgG was used as a negative control (n = 6 in each group). Data are mean ± s.e.m. and each dot represents one replicate (litter); **P* < 0.05; ***P* < 0.01; ****P* < 0.001; Unpaired one-way ANOVA multiple test was used in Figure A; Unpaired Student’s t test with two-tailed distribution was used in Figure B and C.


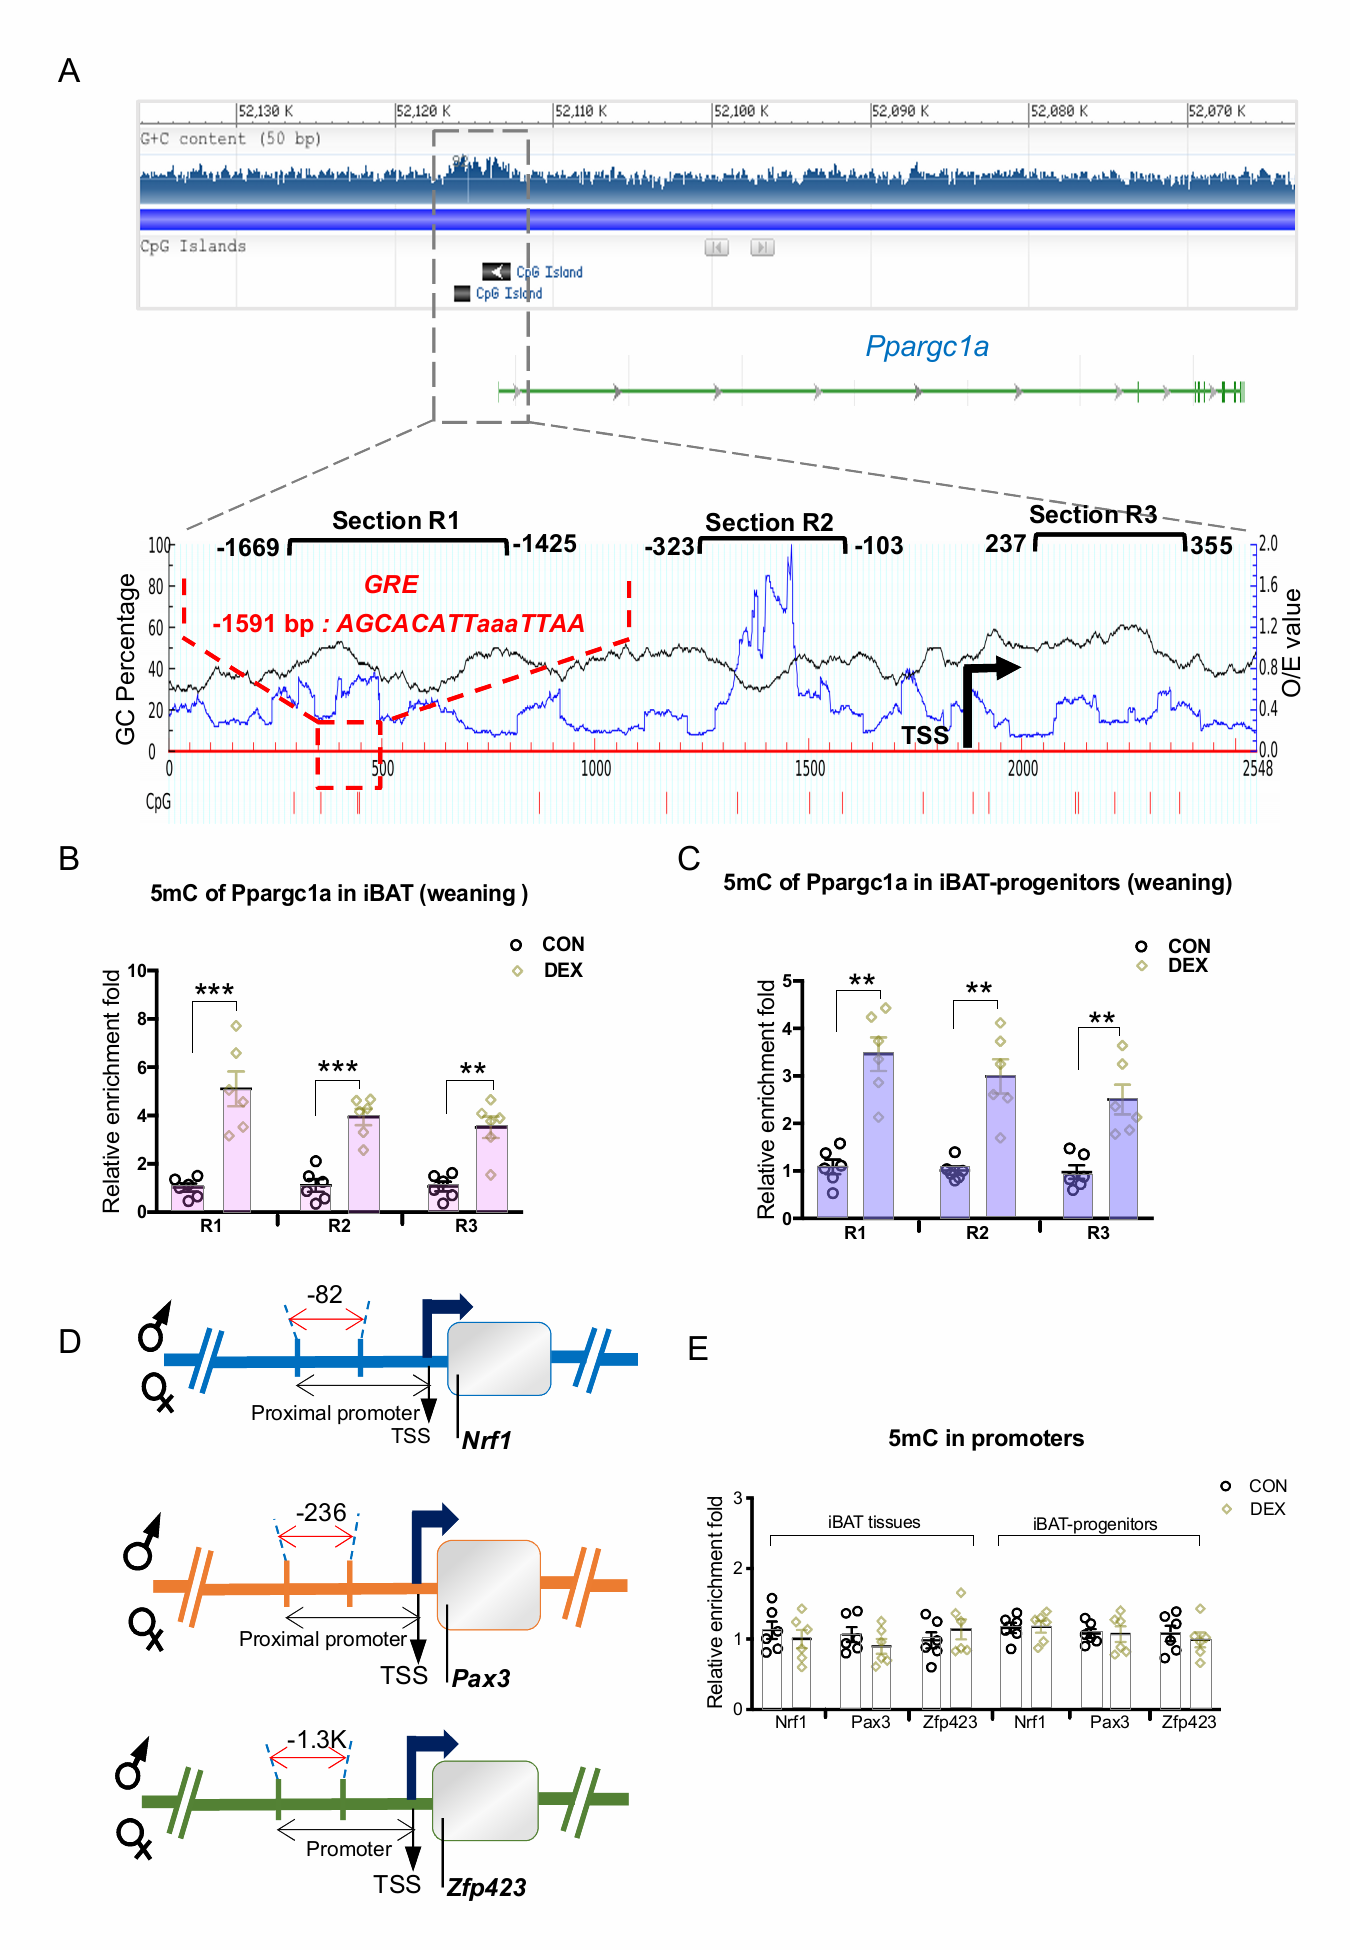


SUPPLEMENTARY DATA

**Supplementary Figure S6.** *A-B*: Quantified mitochondrial number (A) and cristae density (B) of neonatal BAT at P0 under transmission electron microscopy imaging (n = 4). *C*: Concentration of corticosterone in serum of neonates and 4 month old offspring from dexamethasone suppression test. *D*: Survivals of neonates in the first postnatal week. *E*: Mitochondrial DNA (mtDNA) copy of brown progenitors isolated from neonatal BAT. Amplification of mitochondrial genes was standardized to 18S rRNA and GAPDH (n = 6 per group). *F*: Brown progenitors isolated from neonatal BAT at P0 were induced for brown adipogenic differentiation *in vitro* followed with lipid staining and quantification using Oil-Red O (n = 4 per group). Data are mean ± s.e.m. and each dot represents one replicate (litter); **P* < 0.05; ***P* < 0.01; ****P* < 0.001; Unpaired Student’s t test with two-tailed distribution was used in analyses.


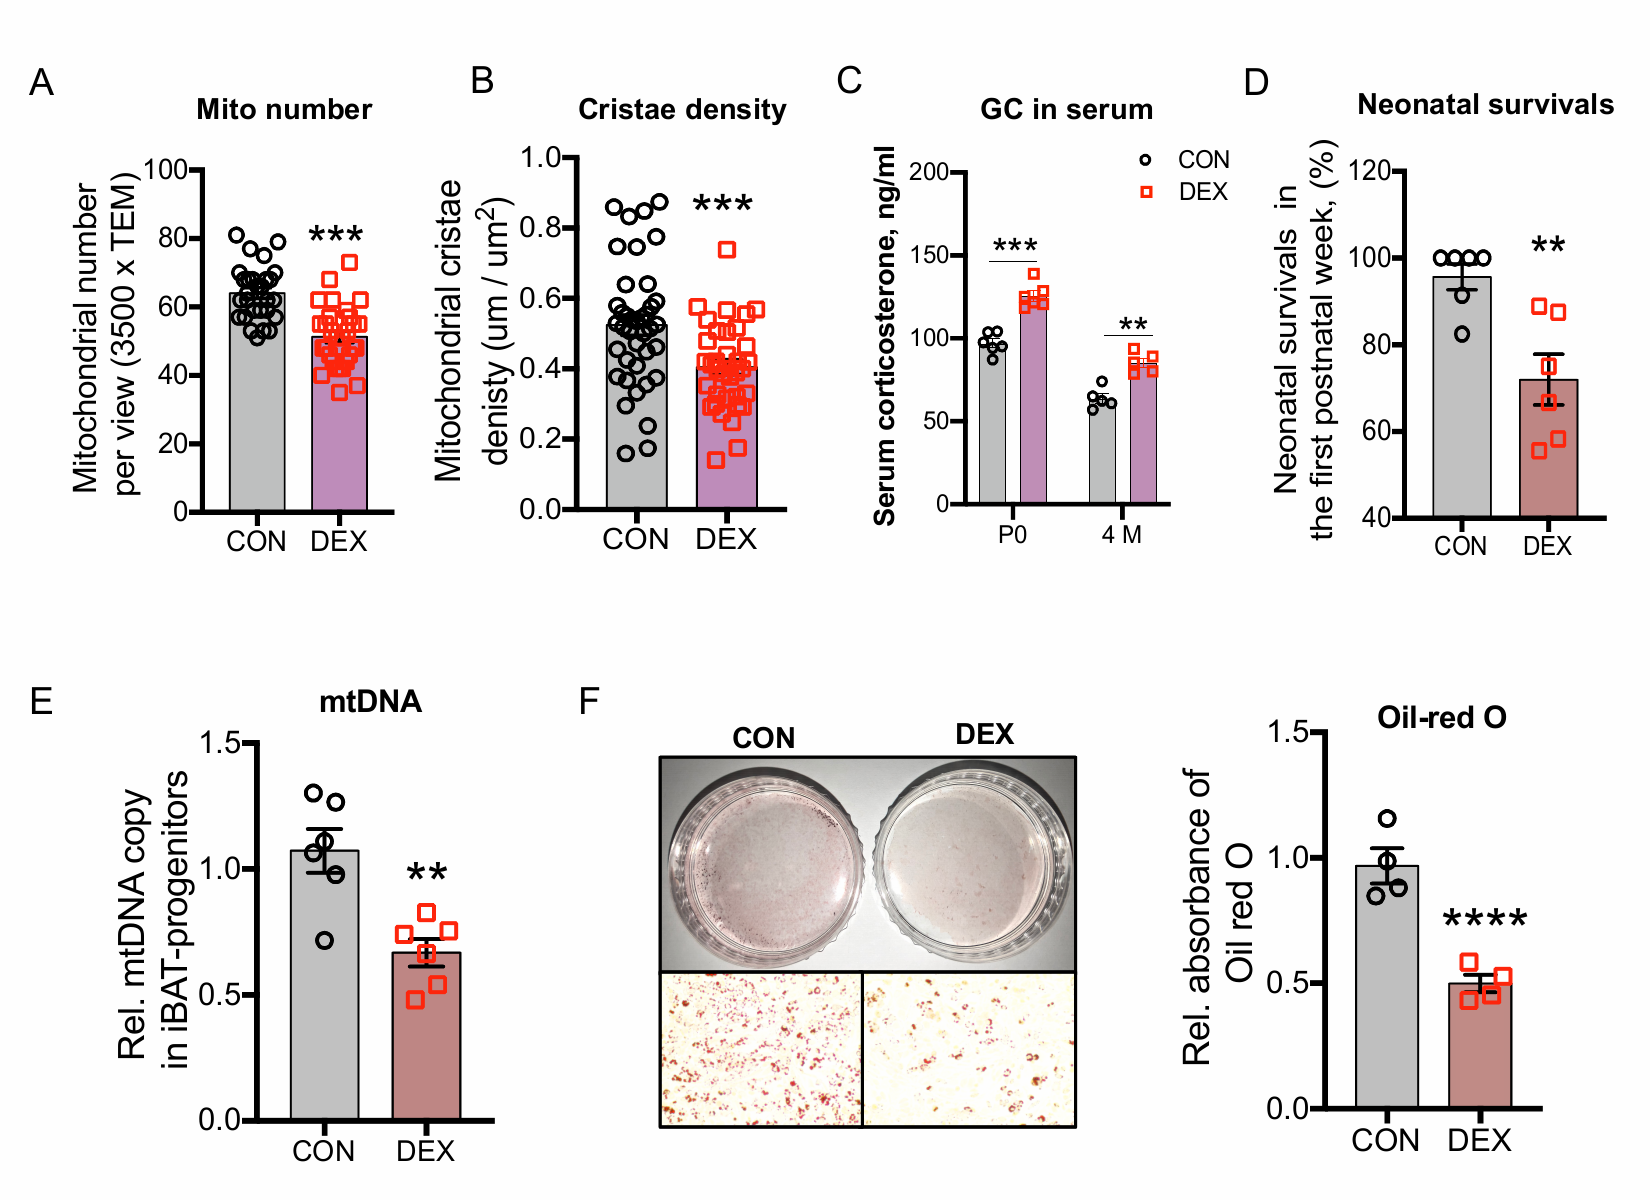


SUPPLEMENTARY DATA

**Supplementary Figure S7.** *A-E*: mRNA expression of *Ppargc1a* (A), protein contents of PGC-1a, VDAC and UCP-1 in immunoblotting (B and C), and mitochondrial DNA copy (mtDNA) (D and E) in offspring BAT and progenitors of offspring at weaning. *F-H*: Thermal imaging displayed the surface body temperature at interscapular region (F), and quantified surface (G) and rectal body temperature (H) in offspring at weaning. I: Co-immunoprecipitation (Co-IP) of GR in BAT of 4 month old offspring. GR and DNMT3b were immunoprecipitated followed with SDS-PAGE separation and measured by western blotting. IgG was used as a mock. Data are mean ± s.e.m. and each dot represents one replicate (litter); **P* < 0.05; ***P* < 0.01; ****P* < 0.001; Unpaired Student’s t test with two-tailed distribution was used in analyses.

**
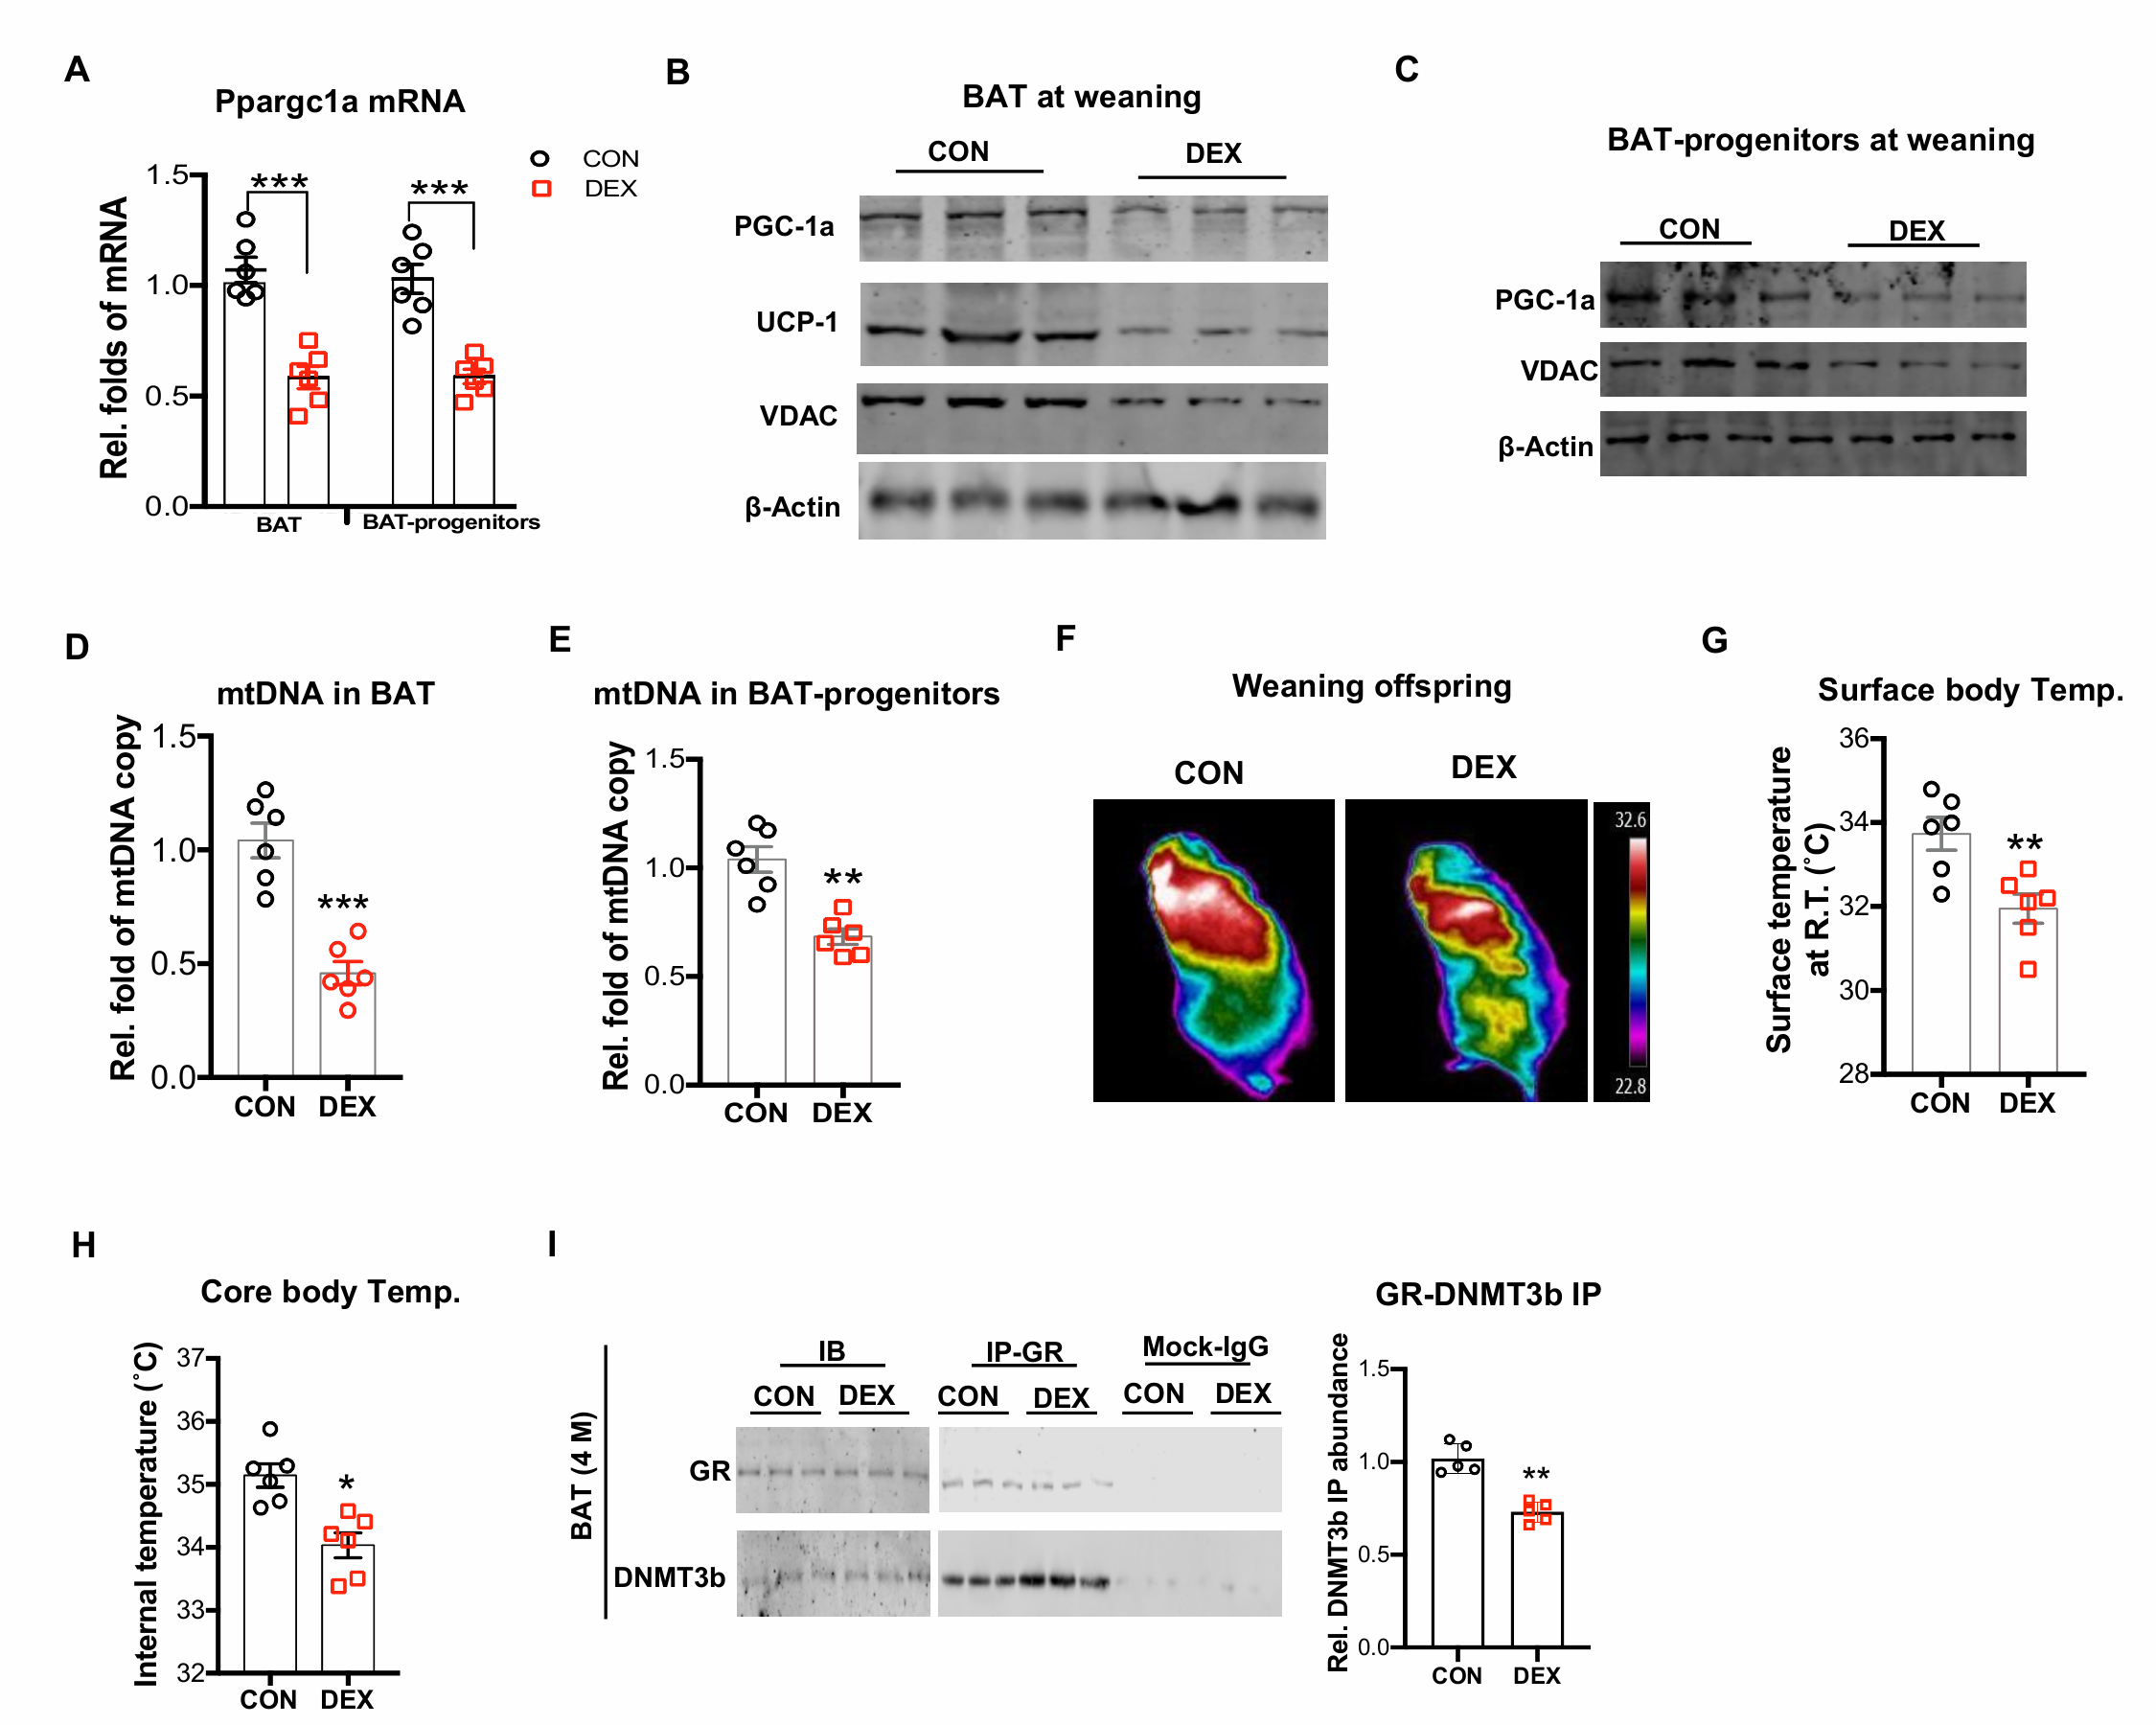
**

**Supplementary Table 1.** Primer sequences used for gene expression and DNA methylation analyses

| **Gene** | **Forward primer** | **Reverse primer** |
| --- | --- | --- |
| qPCR |  |  |
| *18s* | GTAACCCGTTGAACCCCATT | CCATCCAATCGGTAGTAGCG |
| *Gapdh* | CCCTTAAGAGGGATGCTGCC | ACTGTGCCGTTGAATTTGCC |
| *Ppargc1a* | CCATACACAACCGCAGTCGC | GTGGGAGGAGTTAGGCCTGC |
| *Ucp1* | ACTGCCACACCTCCAGTCATT | CTTTGCCTCACTCAGGATTGG |
| *Prdm16* | CAGCACGGTGAAGCCATTC | GCGTGCATCCGCTTGTG |
| *Ppara* | TGGTGTTCGCAGCTGTTTTG | GTCAGTTCACAGGGAAGGCA |
| *Elovl3* | TCCGCGTTCTCATGTAGGTCT | GGACCTGATCCAACCCTATGA |
| *Dio2* | ATTATGCCTCGGAGAAGA | ACCAAAGTTGACCACCAG |
| *Slc27a2* | CCAAAAGCGGCAACCATCAA | GGTACCGAAGCAGTTCACCA |
| *Cox7a* | AAAATGAGGGCCCTACGGGT | GTGTCACTTCTTGTGGGGGAA |
| *Cidea* | ATCACAACTGGCCTGGTTACG | TACTACCCGGTGTCCATTTCT |
| *Oplah* | GCGGGACACAAGCAAGACTA | TCTAGAATTCGGCGGATGCC |
| *Slc4a4* | CACTAGATCCCGGAGAGCCT | GGGGTTCCCCATCGTCAGAG |
| *Cpt1b* | TGGGCAGATACTGCTCCTCT | GCACCCATTTCAAAGCAGGT |
| *Ppara* | TGGTGTTCGCAGCTGTTTTG | AGATACGCCCAAATGCACCA |
| *Acadm* | CTATGCCTCGATTGCAAAGGC | GCACAGATCCAAACTCGTCT |
| *Aco1* | CGATTGTTGACAGGGGTCCT | AGACGCAGGGGTACAAACAG |
| *Tfb1m* | CACCGAGGGCTTGGAATGTT | TAGAACCCGCAGCTTTCTGG |
| *Nrf1* | ACGTTACAGGGCGGTGAAAT | ATCTGGACCAGGCCATTAGC |
| *Nrf2* | GCCCTCAGCATGATGGACTT | TGGTGTCTGTCTGGATGTGC |
| *Tfam* | CCTGAGGAAAAGCAGGCATA | ATGTCTCCGGATCGTTTCAC |
| *Nd1* | CACTATTCGGAGCTTTACG | TGTTTCTGCTAGGGTTGA |
| *Nd2* | ACAACCCATCCCTCACTC | ATTTTGGTAAGAATCCTGTT |
| *Nd3* | CCTAACGCTAATTCTAGTTG | GACGTGCAGAGCTTGTAG |
| *Nd4* | TCCTCAGTTAGCCACATAGCA | AGGCAGAATAGGAGTGATGATG |
| *Atp6* | AACCTGGTGAACTACGAC | GATGTTACTGTTGCTTGAT |
| *Atp8* | ATGCCACAACTAGATACAT | TAGTGATTTTGGTGAAGG |
| *Cox1* | ATGTTCTATCAATGGGAGC | TCTGAGTAGCGTCGTGGT |
| *Cox2* | AGACGAAATCAACAACCC | GGAAGTTCTATTGGCAGA |
| *Cox3* | CGAAACCACATAAATCAAG | AGTAGGCAAACAATAAGGA |
| MeDIP-qPCR |  |  |
| *Ppargc1a R1* | TGAGGAAGACTGTGCTACATATGAGA | TTTCTCTACCCCAAATCAGCTGTCTC |
| *Ppargc1a R2* | GGCTCCGGTTTAGAGTTGGTGGC | TGGGCTGTCACTCACCCAGC |
| *Ppargc1a R3* | TCATGTGACTGGGGACTGTAGTAAG | CCAGCTCCCGAATGACGCCA |
| *Nrf1* | GCCGCTCTGAGGTCGAATGG | GAGAGCTCTGTGCACACCCA |
| *Pax3* | CCCGCTGGAAGGTATGTTAGG | TTGGGTTGAGAAGTACCACGG |
| *Zfp423* | TGTATTTCCAGCGCTGTCCATCG | CAGGAGGATGTGAGGAGCGGAGT |
